# Supplementary figures and images for: Fgfr-Ras-MAPK signaling is required for apical constriction via apical positioning of Rho-associated kinase during mechanosensory organ formation
Source: Oxford University Press journal article supplement (doi:10.1242/dev.082271), 2012-07-26

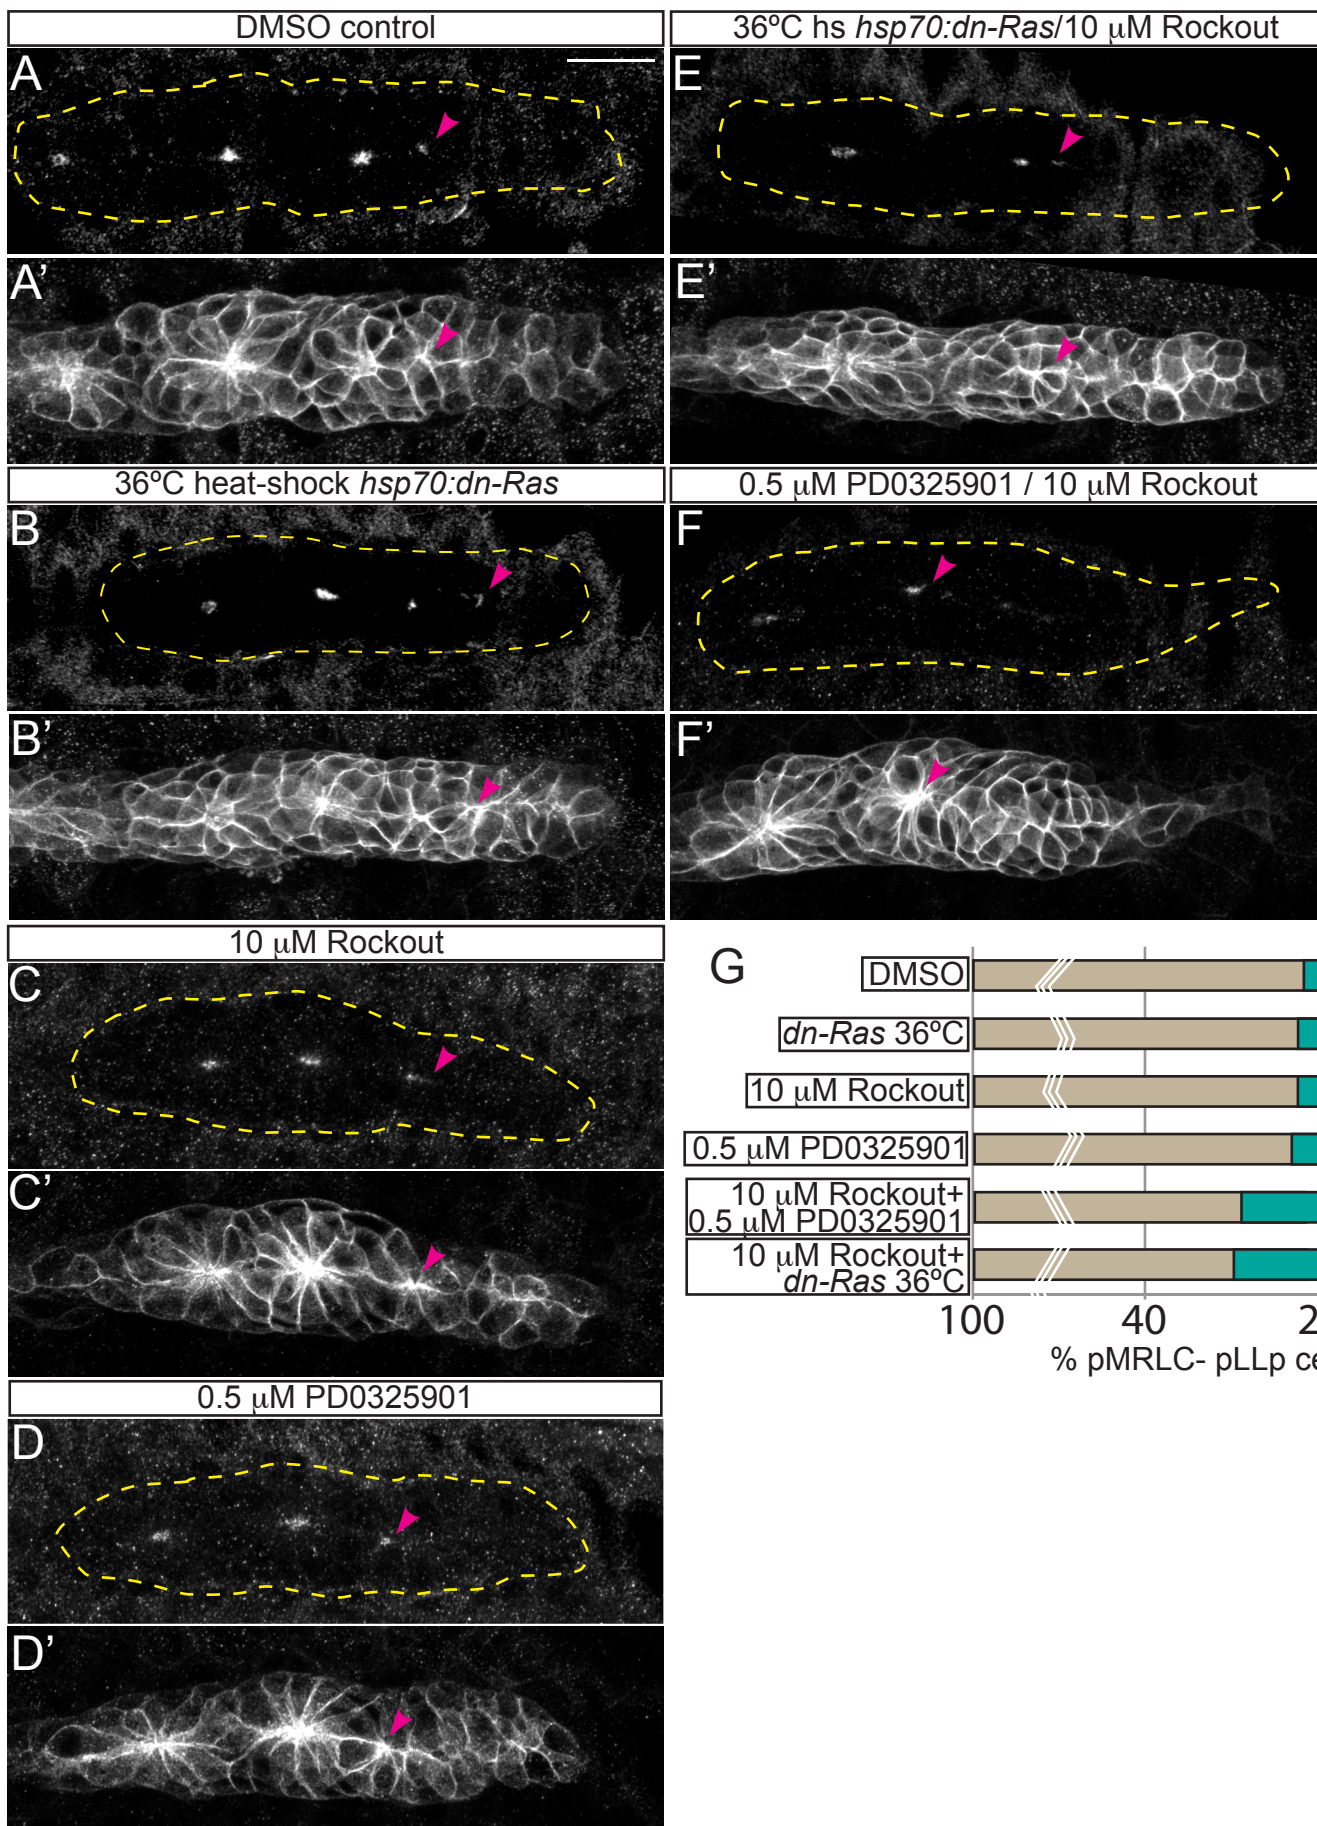

Supplement: dev082271figs6.pdf [file dev082271figs6.pdf]
